# Supplementary material for: Evolutionary origin and demographic history of an ancient conifer (Juniperus microsperma) in the Qinghai-Tibetan Plateau
Source: PubMed Central journal article supplement (PMC4432373; doi:10.1038/srep10216), 2015-05-15
Supplement: srep10216-s1.pdf [file srep10216-s1.pdf]

**Authors:** Hui-Ying Shang, Zhong-Hu Li, Miao Dong, Robert P. Adams, Georg Mieke, Lars Opgenoorth, Kang-Shan Mao

**Title:** Evolutionary origin and demographic history of an ancient conifer (*Juniperus microsperma*) in the Qinghai-Tibetan Plateau

**Supplementary Table S1.** Provenance for the sampled population of *Juniperus microsperma* and its five congeners.

| Species                                | Pop | Location                   | Latitude   | Longitude   | Altitude (m) | n  |
|----------------------------------------|-----|----------------------------|------------|-------------|--------------|----|
| <i>Juniperus microsperma</i><br>(n=60) | 1   | Bomi, XZ                   | 29°39.006' | 96° 12.907' | 3180         | 10 |
|                                        | 2   | Bomi , XZ                  | 29°41.577' | 96° 12.181' | 3181         | 10 |
|                                        | 3   | Bomi , XZ                  | 29°37.244' | 96° 18.214' | 3254         | 10 |
|                                        | 4   | Bomi , XZ                  | 29°39.267' | 96°12.293'  | 3167         | 10 |
|                                        | 5   | Bomi , XZ                  | 29°39.425' | 96°12.475'  | 3184         | 8  |
|                                        | 6   | Bomi , XZ                  | 29°37.003' | 96°19.216'  | 3253         | 4  |
|                                        | 7   | Bomi , XZ                  | 29°40.307' | 96°12.645'  | 3191         | 8  |
| <i>J. sabina</i> (n=12)                | 8   | Fuyun, Xinjiang            | 47°13.67'  | 89°55.14'   | 1367         | 3  |
|                                        | 9   | Jimunai, Xinjiang          | 47°20.79'  | 86°11.59'   | 1250         | 3  |
|                                        | 10  | Chifeng, Neimenggu         | 43°31.96'  | 117°12.47'  | 1868         | 3  |
|                                        | 11  | Shandan, GS                | 38°26.625' | 101°20.349' | 3200         | 3  |
| <i>J. semiglobosa</i> (n=11)           | 12  | Aketao, Xinjiang           | 38°47'     | 75°31'      | 3450         | 1  |
|                                        | 13  | Aketao, Xinjiang           | 38°47'     | 75°23'      | 2700         | 1  |
|                                        | 14  | Aketao, Xinjiang           | 38°47'     | 75°18'      | 3060         | 1  |
|                                        | 15  | Gilgit-Baltistan, Pakistan | 36°34'     | 73° 33'     | 3260         | 1  |
|                                        | 16  | Dushanbe, Tajikistan       | 37°50'     | 74°31'      | 3600         | 1  |
|                                        | 17  | Gilgit-Baltistan, Pakistan | 36°30'     | 74°45'      | 3200         | 1  |
|                                        | 18  | Gilgit-Baltistan, Pakistan | 36°51'     | 74°48'      | 4000         | 1  |
|                                        | 19  | Gilgit-Baltistan, Pakistan | 36°33'     | 74°45'      | 3815         | 1  |
|                                        | 20  | Gilgit-Baltistan, Pakistan | 36°35'     | 74°46'      | 3180         | 1  |
|                                        | 21  | Gilgit-Baltistan, Pakistan | 35°42'     | 75°23'      | 3400         | 1  |
|                                        | 22  | Gilgit-Baltistan, Pakistan | 36°49'     | 74°16'      | 3740         | 1  |
| <i>J. convallium</i> (n=37)            | 23  | Langxian, XZ               | 29°01.636' | 093°03.469' | 3150         | 8  |
|                                        | 24  | Sangri, XZ                 | 29°18.246' | 092°08.523' | 4080         | 8  |
|                                        | 25  | Gongga, XZ                 | 29°02.520' | 090°05.033' | 3900         | 8  |
|                                        | 26  | Mangkang, XZ               | 29°12.473' | 098°39.796' | 3720         | 1  |
|                                        | 27  | Nangqian, QH               | 32°45.113' | 096°38.188' | 4070         | 3  |
|                                        | 28  | Xiewu, QH                  | 33°04.740' | 097°17.335' | 3670         | 2  |
|                                        | 29  | Jiangda, XZ                | 31°36.496' | 098°30.340' | 4140         | 7  |

|                            |    |                  |            |             |      |    |
|----------------------------|----|------------------|------------|-------------|------|----|
| <i>J. saltuaria</i> (n=39) | 30 | Linzhi, XZ       | 29°37.235' | 094°37.619' | 4160 | 7  |
|                            | 31 | Mangkang, XZ     | 29°16.788' | 098°40.824' | 3870 | 8  |
|                            | 32 | Baimaxueshan, YN | 28°24.558' | 098°58.953' | 3780 | 10 |
|                            | 33 | Songpan, SC      | 32°45.394' | 103°56.989' | 2600 | 1  |
|                            | 34 | Hongyuan, SC     | 32°13.397' | 102°30.898' | 3600 | 2  |
|                            | 35 | Bangda, XZ       | 30°18.197' | 097°15.508' | 4190 | 3  |
|                            | 36 | Kangding, SC     | 29°28.483' | 101°26.526' | 3354 | 5  |
|                            | 37 | Daofu, SC        | 31°04.524' | 100°59.967' | 3060 | 3  |
| <i>J. tibetica</i> (n=80)  | 38 | Langkazi, XZ     | 29°22.066' | 090°53.136' | 3660 | 3  |
|                            | 39 | Jiacha, XZ       | 29°06.319' | 092°29.916' | 3650 | 7  |
|                            | 40 | Sangri, XZ       | 29°18.246' | 092°08.523' | 4080 | 3  |
|                            | 41 | Yadong, XZ       | 27°43.283' | 088°58.092' | 4000 | 4  |
|                            | 42 | Langxian, XZ     | 29°01.636' | 093°03.469' | 3150 | 7  |
|                            | 43 | Nangqian, QH     | 31°52.503' | 096°17.552' | 3720 | 4  |
|                            | 44 | Nangqian, QH     | 31°56.511' | 096°26.653' | 4300 | 3  |
|                            | 45 | Langlashan, XZ   | 30°18.197' | 097°15.753' | 4330 | 5  |
|                            | 46 | Yelashan, XZ     | 30°07.385' | 097°16.674' | 4220 | 4  |
|                            | 47 | Changdu, XZ      | 31°20.643' | 097°12.869' | 3320 | 5  |
|                            | 48 | Jiangda, XZ      | 31°28.509' | 098°11.627' | 3590 | 6  |
|                            | 49 | Jiangda, XZ      | 31°36.496' | 098°30.340' | 4140 | 1  |
|                            | 50 | Dege, SC         | 31°55.592' | 098°49.308' | 3740 | 3  |
|                            | 51 | Ranwu, XZ        | 29°30.249' | 096°43.235' | 3800 | 4  |
|                            | 52 | Bomi, XZ         | 29°40.307' | 096°12.643' | 3200 | 2  |
|                            | 53 | Yushu, QH        | 32°15.837' | 096°55.470' | 3660 | 6  |
|                            | 54 | Nangqian, QH     | 32°30.054' | 096°22.591' | 3910 | 3  |
|                            | 55 | Xinlong, SC      | 30°58.947' | 100°18.710' | 3070 | 4  |

Abbreviations: XZ, Xizang; QH, Qinghai; SC, Sichuan; YN, Yunnan; GS, Gansu; *n*, number of trees sampled.

**Supplementary Table S2.** The variable sites among chloroplast haplotypes based on *trnT*-L and *trnL*-F sequences.

| Chloroplast<br>haplotypes | Nucleotide variable positions |    |    |    |    |     |     |     |     |     |     |     |     |     |     |     |     |
|---------------------------|-------------------------------|----|----|----|----|-----|-----|-----|-----|-----|-----|-----|-----|-----|-----|-----|-----|
|                           | <i>trnT-trnF</i>              |    |    |    |    |     |     |     |     |     |     |     |     |     |     |     |     |
|                           | 34                            | 39 | 55 | 60 | 85 | 152 | 174 | 277 | 339 | 350 | 367 | 381 | 406 | 534 | 632 | 767 | 833 |
| H1                        | G                             | A  | ★  | -  | -  | A   | -   | A   | A   | G   | G   | C   | ◆   | G   | C   | C   | C   |
| H2                        | G                             | A  | □  | ▲  | -  | A   | -   | A   | A   | G   | G   | C   | ◆   | G   | C   | C   | C   |
| H3                        | G                             | A  | ★  | ◎  | -  | A   | -   | A   | A   | G   | G   | C   | ◆   | G   | C   | C   | C   |
| H4                        | G                             | A  | ★  | ◎  | ◎  | A   | -   | A   | A   | G   | G   | C   | ◆   | G   | C   | C   | C   |
| H5                        | G                             | A  | ★  | ●  | -  | C   | -   | A   | A   | G   | G   | C   | ◆   | G   | C   | C   | C   |
| H6                        | T                             | C  | ★  | -  | -  | A   | -   | A   | G   | T   | G   | T   | -   | G   | T   | C   | T   |
| H7                        | T                             | C  | -  | -  | -  | A   | -   | A   | G   | T   | G   | T   | -   | A   | C   | C   | T   |
| H8                        | T                             | C  | -  | -  | -  | A   | ☆   | A   | G   | T   | G   | T   | -   | A   | C   | C   | T   |
| H9                        | T                             | C  | ★  | -  | -  | A   | -   | G   | G   | T   | A   | T   | -   | A   | C   | A   | T   |
| H10                       | T                             | C  | ★  | -  | -  | A   | -   | A   | G   | T   | A   | T   | -   | A   | C   | A   | T   |

Note, dashes indicate missing nucleotides; ★ = TAATA; □ = GAATA; ☆ = TTAATGGATTATTATAAAA; ▲ = AATTATAGCGAATCGAATTAGAATA; ◆ = GAATA; ◎ = AATTATAGCGAATCGAATTATAATA; ● = AATTCTAGCGAATCGAATTAGAATA.

**Supplementary Table S3.** Nucleotide variation, nucleotide diversity, haplotype diversity and neutrality tests at eight nuclear loci for *Juniperus microsperma* and its five congeners, *J. sabina*, *J. semiglobosa*, *J. tibetica*, *J. convallium*, and *J. saltuaria*.

| species                      | Loci           | Total  |      |       | Nonsynonymous |         |       | Silent sites  |         | Diversity      |             | Neutrality tests |         |           |           |          |           |
|------------------------------|----------------|--------|------|-------|---------------|---------|-------|---------------|---------|----------------|-------------|------------------|---------|-----------|-----------|----------|-----------|
|                              |                | N      | L    | S     | $\theta_{wt}$ | $\pi_t$ | Rm    | $\theta_{wa}$ | $\pi_a$ | $\theta_{sil}$ | $\pi_{sil}$ | Nh               | He      | D         | H         | D*       | F*        |
| <i>Juniperus microsperma</i> | <i>CC1147</i>  | 120    | 612  | 11    | 0.00335       | 0.00685 | 2     | 0.00231       | 0.0062  | 0.00727        | 0.0093      | 5                | 0.539   | 2.65064*  | 0.26246   | 1.41355  | 2.20923** |
|                              | <i>CC1333</i>  | 118    | 386  | 12    | 0.00582       | 0.00124 | 1     | n.a.          | 0.00031 | n.a.           | 0.00195     | 8                | 0.147   | -2.04226* | -1.48573  | -1.11961 | -1.72993  |
|                              | <i>CC2241</i>  | 118    | 351  | 4     | 0.00213       | 0.00209 | 2     | 0             | 0       | 0.00269        | 0.00263     | 7                | 0.397   | -0.04152  | -1.88556  | 0.92663  | 0.72154   |
|                              | <i>CC2920</i>  | 116    | 685  | 7     | 0.00192       | 0.00201 | 2     | 0.00109       | 0.00101 | 0.00452        | 0.00515     | 6                | 0.598   | 0.11251   | -2.5991   | -0.60148 | -0.42469  |
|                              | <i>Hema</i>    | 118    | 909  | 2     | 0.00041       | 0.00009 | 0     | 0.00054       | 0.00012 | 0              | 0           | 3                | 0.083   | -1.15799  | 0.0817    | 0.67279  | 0.12131   |
|                              | <i>LHCA4</i>   | 126    | 733  | 6     | 0.00151       | 0.00122 | 2     | n.a.          | 0.0015  | n.a.           | 0.00104     | 5                | 0.207   | -0.42625  | -4.1219   | 1.10147  | 0.6946    |
|                              | <i>Maldehy</i> | 88     | 456  | 4     | 0.00174       | 0.00179 | 0     | 0.00208       | 0.00214 | 0.00166        | 0.00171     | 2                | 0.204   | 0.05834   | 0.71055   | 0.95186  | 0.78272   |
|                              | <i>pgi</i>     | 118    | 372  | 5     | 0.00252       | 0.00428 | 0     | 0.00065       | 0.00111 | 0.00871        | 0.01484     | 3                | 0.33    | 1.45595   | -2.45516  | 1.02291  | 1.37679   |
|                              | Total          | 922    | 4504 | 51    | 0.0194        | 0.01957 | 9     | 0.00667       | 0.01239 | 0.02485        | 0.03662     | 39               | 2.505   | 0.00104   | -11.49274 | 4.36812  | 1.54234   |
|                              | Average        | 115.25 | 563  | 6.375 | 0.00243       | 0.00245 | 1.13  | 0.00111       | 0.00155 | 0.00414        | 0.00458     | 4.88             | 0.31313 | 0.00017   | -1.43659  | 0.54601  | 0.22033   |
| <i>J. sabina</i>             | <i>CC1147</i>  | 28     | 612  | 10    | 0.0042        | 0.00522 | 2     | 0.00372       | 0.00353 | 0.00603        | 0.0116      | 10               | 0.799   | 0.78033   | 0.97884   | 1.40629* | 1.42024   |
|                              | <i>CC1333</i>  | 24     | 386  | 8     | 0.00555       | 0.00579 | 0     | 0.00165       | 0.00302 | 0.00851        | 0.00793     | 8                | 0.851   | 0.13958   | 0.21014   | -0.4561  | -0.32684  |
|                              | <i>CC2241</i>  | 22     | 351  | 9     | 0.00703       | 0.00941 | 5     | 0             | 0       | 0.00887        | 0.01187     | 12               | 0.866   | 1.13242   | 1.74892   | 1.37569* | 1.51473   |
|                              | <i>CC2920</i>  | 24     | 685  | 8     | 0.00313       | 0.00375 | 1     | 0.00155       | 0.00255 | 0.00809        | 0.00752     | 8                | 0.609   | 0.63879   | 0.35507   | 0.14046  | 0.33332   |
|                              | <i>Hema</i>    | 24     | 909  | 1     | 0.00029       | 0.00009 | 0     | 0             | 0       | 0.00124        | 0.00038     | 2                | 0.083   | -1.15933  | 0.07971   | -1.60583 | -1.7042   |
|                              | <i>LHCA4</i>   | 22     | 733  | 12    | 0.00487       | 0.0042  | 1     | 0.00288       | 0.00262 | 0.00614        | 0.00522     | 12               | 0.931   | -0.48064  | 0.57143   | 0.29259  | 0.07463   |
|                              | <i>Maldehy</i> | 20     | 456  | 4     | 0.00309       | 0.00256 | 0     | 0.00592       | 0.0057  | 0.00236        | 0.00175     | 5                | 0.616   | -0.52308  | 0.73684   | 0.38667  | 0.15284   |
|                              | <i>pgi</i>     | 24     | 372  | 6     | 0.00432       | 0.00235 | 0     | 0.00281       | 0.00192 | 0.00931        | 0.00377     | 6                | 0.5     | -1.38074  | 0.78986   | -0.23775 | -0.65959  |
|                              | Total          | 188    | 4504 | 58    | 0.03248       | 0.03337 | 9     | 0.01853       | 0.01934 | 0.05055        | 0.05004     | 63               | 5.255   | -0.85267  | 5.47081   | -1.47996 | 0.80513   |
|                              | Average        | 23.5   | 563  | 7.25  | 0.00406       | 0.00417 | 1.125 | 0.00232       | 0.00242 | 0.00632        | 0.00626     | 7.875            | 0.65688 | -0.10658  | 0.68385   | -0.2467  | 0.10064   |

|                       |                |       |      |       |         |         |       |         |         |         |         |       |         |           |           |           |           |
|-----------------------|----------------|-------|------|-------|---------|---------|-------|---------|---------|---------|---------|-------|---------|-----------|-----------|-----------|-----------|
| <i>J. semiglobosa</i> | <i>CC1147</i>  | 16    | 612  | 9     | 0.00443 | 0.00613 | 0     | 0.00436 | 0.00646 | 0.0047  | 0.00487 | 3     | 0.575   | 1.40516   | 1.63333   | 0.42855   | 0.80053   |
|                       | <i>CC1333</i>  | 36    | 386  | 6     | 0.00375 | 0.00127 | 0     | 0.00298 | 0.00069 | 0.00438 | 0.00172 | 5     | 0.213   | -1.80614* | -6.9619   | -1.21901  | -1.63271  |
|                       | <i>CC2241</i>  | 40    | 351  | 10    | 0.00737 | 0.00571 | 0     | 0       | 0       | 0.00929 | 0.0072  | 10    | 0.812   | -0.68167  | -2.38974  | -0.18881  | -0.40872  |
|                       | <i>CC2920</i>  | 12    | 685  | 1     | 0.00048 | 0.00024 | 0     | 0.00064 | 0.00032 | 0       | 0       | 2     | 0.167   | -1.14053  | -1.66667  | -1.32974  | -1.44334  |
|                       | <i>HemA</i>    | 8     | 909  | 2     | 0.00085 | 0.0009  | 0     | 0.00056 | 0.00036 | 0.00178 | 0.00264 | 3     | 0.679   | 0.24178   | 0.21429   | -0.14931  | -0.06487  |
|                       | <i>LHCA4</i>   | 16    | 733  | 2     | 0.00082 | 0.00072 | 0     | 0       | 0       | 0.00135 | 0.00118 | 3     | 0.425   | -0.3301   | -0.68333  | -0.50381  | -0.52297  |
|                       | <i>Maldehy</i> | 10    | 456  | 9     | 0.00698 | 0.00819 | 0     | 0.00371 | 0.00374 | 0.0079  | 0.00944 | 5     | 0.889   | 0.75971   | 2.13333   | 1.43508*  | 1.42579   |
|                       | <i>pgi</i>     | 36    | 372  | 4     | 0.00259 | 0.0006  | 0     | 0.00169 | 0.00039 | 0.00556 | 0.00129 | 2     | 0.056   | -1.88514* | -7.55556  | -3.14683* | -3.22414* |
|                       | Total          | 174   | 4504 | 43    | 0.02727 | 0.02376 | 0     | 0.01394 | 0.01196 | 0.03496 | 0.02834 | 33    | 3.816   | 0.25435   | -15.27625 | -2.96213  | -1.84629  |
|                       | Average        | 21.75 | 563  | 5.375 | 0.00341 | 0.00297 | 0     | 0.00174 | 0.0015  | 0.00437 | 0.00354 | 4.125 | 0.477   | 0.04239   | -1.90953  | -0.49369  | -0.26376  |
| <i>J. convallium</i>  | <i>CC1147</i>  | 56    | 612  | 5     | 0.00178 | 0.00114 | 0     | 0.0009  | 0.001   | 0.00509 | 0.00164 | 6     | 0.545   | -0.85346  | 0.51948   | 1.08675   | 0.5581    |
|                       | <i>CC1333</i>  | 70    | 386  | 5     | 0.00269 | 0.00332 | 0     | 0.00257 | 0.00378 | 0.00283 | 0.00304 | 4     | 0.343   | 0.53389   | -4.1027   | 1.06726   | 1.05281   |
|                       | <i>CC2241</i>  | 62    | 351  | 2     | 0.00121 | 0.00256 | 0     | 0.00305 | 0.00557 | 0.00077 | 0.00182 | 3     | 0.626   | 1.87657   | -0.7636   | 0.7263    | 1.24621   |
|                       | <i>CC2920</i>  | 70    | 685  | 5     | 0.00151 | 0.00085 | 0     | 0.0016  | 0.0009  | 0.00127 | 0.00067 | 5     | 0.31    | -1.00067  | 0.52174   | 1.06726   | 0.47607   |
|                       | <i>HemA</i>    | 66    | 909  | 4     | 0.00092 | 0.00071 | 0     | 0.0003  | 0.00009 | 0.00291 | 0.00269 | 4     | 0.274   | -0.50698  | -2.2863   | 0.97791   | 0.60001   |
|                       | <i>LHCA4</i>   | 60    | 733  | 4     | 0.00117 | 0.00135 | 1     | 0       | 0       | 0.0019  | 0.0022  | 6     | 0.716   | 0.33606   | -0.3254   | 0.98685   | 0.91743   |
|                       | <i>Maldehy</i> | 72    | 456  | 4     | 0.00181 | 0.00092 | 0     | 0       | 0       | 0.00231 | 0.00117 | 4     | 0.341   | -1.03543  | 0.38811   | 0.96989   | 0.39549   |
|                       | <i>pgi</i>     | 72    | 372  | 11    | 0.0061  | 0.0029  | 0     | 0.00431 | 0.0028  | 0.01214 | 0.00322 | 5     | 0.516   | -1.43819  | -13.336   | 1.43322   | 0.52958   |
|                       | Total          | 528   | 4504 | 40    | 0.01719 | 0.01375 | 1     | 0.01273 | 0.01414 | 0.02922 | 0.01645 | 37    | 3.671   | -2.08821  | -19.385   | 8.31544   | 5.7757    |
|                       | Average        | 66    | 563  | 5     | 0.00215 | 0.00172 | 0.125 | 0.00160 | 0.00177 | 0.00365 | 0.00206 | 4.625 | 0.45888 | -0.26103  | -2.4231   | 1.03943   | 0.72197   |
| <i>J. saltuaria</i>   | <i>CC1147</i>  | 26    | 612  | 5     | 0.00214 | 0.00298 | 0     | 0.00163 | 0.00244 | 0.00409 | 0.00499 | 5     | 0.8     | 1.10571   | 0.44308   | 1.15807   | 1.32578   |
|                       | <i>CC1333</i>  | 42    | 386  | 7     | 0.00421 | 0.0051  | 1     | 0.00287 | 0.00574 | 0.00528 | 0.00473 | 9     | 0.785   | 0.57785   | -1.62137  | 1.25279   | 1.21994   |
|                       | <i>CC2241</i>  | 54    | 351  | 8     | 0.005   | 0.00357 | 1     | 0.0063  | 0.00209 | 0.00473 | 0.00398 | 9     | 0.769   | -0.77108  | 0.84416   | 1.2963    | 0.73433   |
|                       | <i>CC2920</i>  | 60    | 685  | 9     | 0.00282 | 0.00203 | 0     | 0.00124 | 0.00158 | 0.00786 | 0.00349 | 9     | 0.694   | -0.75499  | 1.02147   | 1.34474   | 0.76469   |
|                       | <i>HemA</i>    | 72    | 909  | 5     | 0.00113 | 0.00117 | 0     | 0       | 0       | 0.00476 | 0.00489 | 6     | 0.587   | 0.06097   | 0.82316   | 1.06482   | 0.87262   |

|                    |                |        |      |       |         |         |      |         |         |         |         |       |         |          |          |          |         |
|--------------------|----------------|--------|------|-------|---------|---------|------|---------|---------|---------|---------|-------|---------|----------|----------|----------|---------|
|                    | <i>LHCA4</i>   | 58     | 733  | 4     | 0.00118 | 0.00092 | 0    | 0.00076 | 0.00024 | 0.00144 | 0.00134 | 4     | 0.515   | -0.48692 | 0.50333  | 0.99007  | 0.62147 |
|                    | <i>Maldehy</i> | 66     | 456  | 9     | 0.00415 | 0.00214 | 0    | 0.00221 | 0.00121 | 0.0047  | 0.00241 | 8     | 0.649   | -1.28792 | -0.75338 | 1.34047  | 0.54425 |
|                    | <i>pgi</i>     | 68     | 372  | 15    | 0.00842 | 0.00781 | 0    | 0.00728 | 0.00693 | 0.01223 | 0.01077 | 9     | 0.771   | -0.21075 | -7.50132 | 1.58187* | 1.13075 |
|                    | Total          | 446    | 4504 | 62    | 0.02905 | 0.02572 | 2    | 0.02229 | 0.02023 | 0.04509 | 0.0366  | 59    | 5.57    | -1.76713 | -6.24087 | 8.44726  | 7.21383 |
|                    | Average        | 55.75  | 563  | 7.75  | 0.00363 | 0.00321 | 0.25 | 0.00279 | 0.00253 | 0.00564 | 0.00458 | 7.375 | 0.69625 | -0.22090 | -0.78011 | 1.20675  | 0.90173 |
| <i>J. tibetica</i> | <i>CC1147</i>  | 98     | 612  | 3     | 0.00095 | 0.00112 | 1    | 0.0008  | 0.00111 | 0.00151 | 0.00118 | 5     | 0.575   | 0.33028  | 0.55207  | 0.82851  | 0.78754 |
|                    | <i>CC1333</i>  | 112    | 386  | 6     | 0.00294 | 0.0041  | 2    | 0.00234 | 0.00483 | 0.00343 | 0.00363 | 9     | 0.728   | 0.87027  | -2.78378 | 1.11091  | 1.2182  |
|                    | <i>CC2241</i>  | 92     | 351  | 7     | 0.00392 | 0.0026  | 0    | 0.00845 | 0.00404 | 0.00282 | 0.00227 | 7     | 0.668   | -0.79801 | 0.46249  | 1.19959  | 0.62548 |
|                    | <i>CC2920</i>  | 112    | 685  | 6     | 0.00193 | 0.00148 | 1    | 0.00145 | 0.00143 | 0.00346 | 0.00166 | 9     | 0.631   | -0.53434 | 0.80824  | 1.18496  | 0.71171 |
|                    | <i>HemA</i>    | 138    | 909  | 5     | 0.001   | 0.00132 | 0    | 0.00053 | 0.00012 | 0.00252 | 0.00514 | 6     | 0.64    | 0.64601  | 0.15022  | 1.01     | 1.05133 |
|                    | <i>LHCA4</i>   | 126    | 733  | 10    | 0.00252 | 0.0032  | 2    | 0.00065 | 0.00011 | 0.00369 | 0.00513 | 12    | 0.769   | 0.66132  | 0.87721  | 1.35975  | 1.32355 |
|                    | <i>Maldehy</i> | 156    | 456  | 7     | 0.00273 | 0.00135 | 0    | 0.00187 | 0.0015  | 0.00298 | 0.00132 | 6     | 0.496   | -1.1116  | -1.40281 | 1.15961  | 0.4455  |
|                    | <i>pgi</i>     | 156    | 372  | 3     | 0.00143 | 0.00167 | 0    | 0.00186 | 0.00217 | 0       | 0       | 4     | 0.55    | 0.27839  | 0.47113  | 0.79108  | 0.73804 |
|                    | Total          | 990    | 4504 | 47    | 0.01742 | 0.01684 | 6    | 0.01795 | 0.01531 | 0.02041 | 0.02033 | 58    | 5.057   | 0.34232  | -0.86523 | 8.64441  | 6.90135 |
|                    | Average        | 123.75 | 563  | 5.875 | 0.00218 | 0.00211 | 0.75 | 0.00224 | 0.00191 | 0.00255 | 0.00254 | 7.25  | 0.63215 | 0.04279  | -0.10815 | 1.08055  | 0.86267 |

Abbreviations: N, sample size; L, length in base pairs; S, number of segregating sites;  $\pi$ , nucleotide diversity (Nei and Li, 1979);  $\theta$ , Watterson's parameter (Watterson, 1975); Rm, the minimum number of recombinant events; Nh, number of haplotypes; He, Nei's haplotypic diversity; D, Tajima's D statistic (Tajima, 1989); H, Fay and Wu's H (Fay and Wu, 2000); D\*, F\*, Fu and Li's D\*, F\* test (Fu and Li, 1993); NE, not informative; NA, failed to be computed due to insufficient variation. Significance level: \*0.01  $\leq$  P < 0.05; \*\* 0.001  $\leq$  P < 0.01; \*\*\*P < 0.001.

**Supplementary Table S4.** Genetic divergence at eight nuclear loci between *Juniperus microsperma* and each of its five congeners based on pairwise comparisons.

| Group          | JM vs. JSA |         | JM vs. JSE |         | JM vs. JCON |         | JM vs. JSAL |         | JM vs. JTIB |         | JSA vs. JSE |         |
|----------------|------------|---------|------------|---------|-------------|---------|-------------|---------|-------------|---------|-------------|---------|
|                | <i>FST</i> | Da      | <i>FST</i> | Da      | <i>FST</i>  | Da      | <i>FST</i>  | Da      | <i>FST</i>  | Da      | <i>FST</i>  | Da      |
| <i>CC1147</i>  | 0.31552*** | 0.00304 | 0.05811    | 0.00044 | 0.69387***  | 0.01146 | 0.5937***   | 0.00908 | 0.72757***  | 0.01143 | 0.21579***  | 0.00151 |
| <i>CC1333</i>  | 0.7149***  | 0.00491 | 0.85111*** | 0.00714 | 0.82662***  | 0.00959 | 0.80684***  | 0.00934 | 0.77959***  | 0.00931 | 0.22052***  | 0.00083 |
| <i>CC2241</i>  | 0.78491*** | 0.01155 | 0.81251*** | 0.01294 | 0.90008***  | 0.02024 | 0.88781***  | 0.02016 | 0.89689***  | 0.0201  | 0.30017***  | 0.00297 |
| <i>CC2920</i>  | 0.71686*** | 0.0058  | 0.81884*** | 0.00847 | 0.95322***  | 0.0321  | 0.94085***  | 0.03212 | 0.94783***  | 0.03185 | 0.41843***  | 0.30017 |
| <i>HemA</i>    | 0.00684    | 0       | 0.67338*** | 0.00024 | 0.8961***   | 0.00268 | 0.71101***  | 0.00122 | 0.68871***  | 0.00167 | 0.44439***  | 0.00019 |
| <i>LHCA4</i>   | 0.7057***  | 0.00389 | 0.90402*** | 0.01096 | 0.90299***  | 0.01172 | 0.91232***  | 0.01168 | 0.80543***  | 0.00913 | 0.74511***  | 0.00806 |
| <i>Maldehy</i> | 0.16192**  | 0.00036 | 0.54634*** | 0.00259 | 0.62432***  | 0.00232 | 0.54839***  | 0.00235 | 0.60986***  | 0.00235 | 0.35681***  | 0.00227 |
| <i>PGI</i>     | 0.68656*** | 0.00872 | 0.76078*** | 0.01096 | 0.87865***  | 0.02722 | 0.79947***  | 0.02219 | 0.90643***  | 0.02708 | 0.60238***  | 0.00194 |

Abbreviations: JM, *J. microsperma*; JSA, *J. sabina*; JSE, *J. semiglobosa*; JCON, *J. convallium*; JSAL, *J. saltuaria*; JTIB, *J. tibetica*. Significance level: \*P < 0.05, \*\*P < 0.01 and \*\*\*P < 0.001.

**Supplementary Table S5.** Distribution of segregating sites at eight nuclear loci in pairwise comparisons between *Juniperus microsperma* and each of its five congeners. In each pairwise comparison, S1, S2 are the number of polymorphic sites unique to species 1 and 2, respectively; Ss is the number of sites with shared alleles; and Sf is the number of sites with fixed alleles in either species;  $\Phi_{ST}$  values over all nuclear loci. Abbreviations: JM, *J. microsperma*; JSA, *J. sabina*; JSE, *J. semiglobosa*; JCON, *J. convallium*; JSAL, *J. saltuaria*; JTIB, *J. tibetica*.

| Species     | Gene           | N1  | N2  | S1 | S2 | Ss  | Sf | $\Phi_{ST}$ |
|-------------|----------------|-----|-----|----|----|-----|----|-------------|
| JM vs. JSA  | <i>CC1147</i>  | 120 | 28  | 11 | 10 | 16  | 0  | 0.52257***  |
|             | <i>CC1333</i>  | 118 | 24  | 12 | 8  | 20  | 0  |             |
|             | <i>CC2241</i>  | 118 | 22  | 4  | 9  | 13  | 0  |             |
|             | <i>CC2920</i>  | 116 | 24  | 7  | 8  | 16  | 1  |             |
|             | <i>HemA</i>    | 118 | 24  | 2  | 1  | 3   | 0  |             |
|             | <i>LHCA4</i>   | 126 | 22  | 6  | 12 | 18  | 0  |             |
|             | <i>Maldehy</i> | 88  | 20  | 4  | 4  | 8   | 0  |             |
|             | <i>PGI</i>     | 118 | 24  | 5  | 6  | 11  | 0  |             |
|             | Total          | 922 | 188 | 51 | 58 | 105 | 1  |             |
|             | Average        | 115 | 24  | 6  | 7  | 23  | 0  |             |
| JM vs. JSE  | <i>CC1147</i>  | 120 | 16  | 11 | 9  | 13  | 0  | 0.78665***  |
|             | <i>CC1333</i>  | 118 | 36  | 12 | 6  | 18  | 0  |             |
|             | <i>CC2241</i>  | 118 | 40  | 4  | 10 | 14  | 0  |             |
|             | <i>CC2920</i>  | 116 | 12  | 7  | 1  | 11  | 3  |             |
|             | <i>HemA</i>    | 118 | 8   | 2  | 2  | 4   | 0  |             |
|             | <i>LHCA4</i>   | 126 | 16  | 6  | 2  | 13  | 5  |             |
|             | <i>Maldehy</i> | 88  | 10  | 4  | 9  | 13  | 0  |             |
|             | <i>PGI</i>     | 118 | 36  | 5  | 4  | 7   | 0  |             |
|             | Total          | 922 | 174 | 51 | 43 | 93  | 8  |             |
|             | Average        | 115 | 22  | 6  | 5  | 12  | 1  |             |
| JM vs. JCON | <i>CC1147</i>  | 120 | 56  | 11 | 5  | 21  | 5  | 0.83332***  |
|             | <i>CC1333</i>  | 118 | 70  | 12 | 5  | 19  | 2  |             |
|             | <i>CC2241</i>  | 118 | 62  | 4  | 2  | 11  | 6  |             |
|             | <i>CC2920</i>  | 116 | 70  | 7  | 5  | 32  | 20 |             |
|             | <i>HemA</i>    | 118 | 66  | 2  | 4  | 7   | 1  |             |
|             | <i>LHCA4</i>   | 126 | 60  | 6  | 4  | 16  | 6  |             |
|             | <i>Maldehy</i> | 88  | 72  | 4  | 4  | 9   | 1  |             |
|             | <i>PGI</i>     | 118 | 72  | 5  | 11 | 17  | 2  |             |
|             | Total          | 922 | 528 | 51 | 40 | 132 | 43 |             |
|             | Average        | 115 | 66  | 6  | 5  | 17  | 5  |             |
| JM vs. JSAL | <i>CC1147</i>  | 120 | 26  | 11 | 5  | 19  | 3  | 0.89475***  |
|             | <i>CC1333</i>  | 118 | 42  | 12 | 7  | 21  | 2  |             |
|             | <i>CC2241</i>  | 118 | 54  | 4  | 8  | 17  | 6  |             |
|             | <i>CC2920</i>  | 116 | 60  | 7  | 9  | 34  | 18 |             |



|             |                |     |     |    |    |     |    |            |
|-------------|----------------|-----|-----|----|----|-----|----|------------|
|             | <i>HemA</i>    | 118 | 72  | 2  | 5  | 8   | 1  |            |
|             | <i>LHCA4</i>   | 126 | 58  | 6  | 4  | 16  | 6  |            |
|             | <i>Maldehy</i> | 88  | 66  | 4  | 9  | 14  | 1  |            |
|             | <i>PGI</i>     | 118 | 68  | 5  | 15 | 21  | 2  |            |
|             | Total          | 922 | 446 | 51 | 62 | 150 | 39 |            |
|             | Average        | 115 | 56  | 6  | 8  | 19  | 5  |            |
| JM vs. JTIB | <i>CC1147</i>  | 120 | 98  | 11 | 3  | 19  | 5  | 0.83588*** |
|             | <i>CC1333</i>  | 118 | 112 | 12 | 6  | 20  | 2  |            |
|             | <i>CC2241</i>  | 118 | 92  | 4  | 7  | 16  | 6  |            |
|             | <i>CC2920</i>  | 116 | 112 | 7  | 6  | 31  | 18 |            |
|             | <i>HemA</i>    | 118 | 138 | 2  | 5  | 8   | 1  |            |
|             | <i>LHCA4</i>   | 126 | 126 | 6  | 10 | 19  | 3  |            |
|             | <i>Maldehy</i> | 88  | 156 | 4  | 7  | 12  | 1  |            |
|             | <i>PGI</i>     | 118 | 156 | 5  | 3  | 16  | 8  |            |
|             | Total          | 922 | 990 | 51 | 47 | 141 | 44 |            |
|             | Average        | 115 | 124 | 6  | 6  | 18  | 6  |            |

**Supplementary Table S6.** An HKA test for *Juniperus microsperma* and five of its congeners. Another congener, *J. communis*, was assigned as the outgroup.

| Species                                             | $\chi^2$ | P-value |
|-----------------------------------------------------|----------|---------|
| <i>Juniperus microsperma</i> vs. <i>J. communis</i> | 8.6225   | 0.28091 |
| <i>Juniperus sabina</i> vs. <i>J. communis</i>      | 4.9341   | 0.66801 |
| <i>Juniperus semiglobosa</i> vs. <i>J. communis</i> | 14.3698* | 0.04498 |
| <i>Juniperus convallium</i> vs. <i>J. communis</i>  | 8.1044   | 0.88382 |
| <i>Juniperus saltuaria</i> vs. <i>J. communis</i>   | 2.9173   | 0.89254 |
| <i>Juniperus tibetica</i> vs. <i>J. communis</i>    | 6.5182   | 0.4807  |

Significance level: \*  $P < 0.05$ , \*\* $P < 0.01$  and \*\*\* $P < 0.001$ .

**Supplementary Table S7.** Maximum-likelihood estimates (MLE) and the 95% highest posterior density (HPD) intervals of demographic parameters from pairwise IMA2 multi-loci analyses.

| Pairwise comparison                             |         | $\theta_1$ | $\theta_2$ | $\theta_A$ | m1      | m2      | t      | N1       | N2       | NA       | T(year)  | 2N1m1      | 2N2m2      |
|-------------------------------------------------|---------|------------|------------|------------|---------|---------|--------|----------|----------|----------|----------|------------|------------|
| <i>J. microsperma</i> vs. <i>J. convallium</i>  | HiPt    | 0.708      | 0.756      | 3.804      | 0.00015 | 0.00015 | 1.209  | 4.09E+04 | 4.37E+04 | 2.20E+05 | 1.40E+07 | 0.0001065  | 0.0001251  |
|                                                 | HPD95Lo | 0.468      | 0.476      | 1.644      | 0       | 0       | 0.5238 | 2.71E+04 | 2.75E+04 | 9.50E+04 | 6.06E+06 |            |            |
|                                                 | HPD95Hi | 1.028      | 1.116      | 7.732      | 0.1225  | 0.1345  | 2.321  | 5.94E+04 | 6.45E+04 | 4.47E+05 | 2.68E+07 |            |            |
| <i>J. microsperma</i> vs. <i>J. saltuaria</i>   | HiPt    | 0.772      | 1.54       | 3.02       | 0.0001  | 0.0001  | 1.754  | 4.23E+04 | 8.44E+04 | 1.65E+05 | 1.92E+07 | 0.0000822  | 0.000145   |
|                                                 | HPD95Lo | 0.524      | 1.1        | 0.852      | 0       | 0       | 1.006  | 2.87E+04 | 6.03E+04 | 4.67E+04 | 1.10E+07 |            |            |
|                                                 | HPD95Hi | 1.092      | 2.116      | 7.276      | 0.1159  | 0.0775  | 3.31   | 5.98E+04 | 1.16E+05 | 3.99E+05 | 3.63E+07 |            |            |
| <i>J. microsperma</i> vs. <i>J. tibetica</i>    | HiPt    | 0.6885     | 0.9225     | 2.696      | 0.0001  | 0.0001  | 1.619  | 4.59E+04 | 6.15E+04 | 1.80E+05 | 2.16E+07 | 0.00007492 | 0.00009383 |
|                                                 | HPD95Lo | 0.4545     | 0.6255     | 0.5085     | 0       | 0       | 0.8745 | 3.03E+04 | 3.39E+04 | 3.39E+04 | 1.17E+07 |            |            |
|                                                 | HPD95Hi | 0.9945     | 1.292      | 7.601      | 0.1261  | 0.0905  | 2.804  | 6.63E+04 | 8.61E+04 | 5.07E+05 | 3.74E+07 |            |            |
| <i>J. microsperma</i> vs. <i>J. sabina</i>      | HiPt    | 0.482      | 1.646      | 0.814      | 0.3305  | 0.0225  | 1.234  | 2.69E+04 | 9.19E+04 | 4.54E+04 | 1.38E+07 | 0.09371    | 0.02146    |
|                                                 | HPD95Lo | 0.286      | 1.062      | 0.01       | 0       | 0       | 0.2835 | 1.60E+04 | 5.93E+04 | 5.58E+02 | 3.16E+06 |            |            |
|                                                 | HPD95Hi | 0.782      | 2.502      | 3.322      | 0.8435  | 0.3195  | 2.749  | 4.36E+04 | 1.40E+05 | 1.85E+05 | 3.07E+07 |            |            |
| <i>J. microsperma</i> vs. <i>J. semiglobosa</i> | HiPt    | 0.5805     | 0.7065     | 3.757      | 0.0005  | 0.0005  | 0.3985 | 3.24E+04 | 3.94E+04 | 2.10E+05 | 4.45E+06 | 0.0002171  | 0.0004241  |
|                                                 | HPD95Lo | 0.3285     | 0.3825     | 1.831      | 0       | 0       | 0.1785 | 1.83E+04 | 2.13E+04 | 1.02E+05 | 1.99E+06 |            |            |
|                                                 | HPD95Hi | 0.9045     | 1.192      | 7.303      | 0.2195  | 0.4425  | 0.7765 | 5.05E+04 | 6.65E+04 | 4.08E+05 | 8.67E+06 |            |            |
| <i>J. sabina</i> vs. <i>J. semiglobosa</i>      | HiPt    | 1.73       | 0.386      | 0.002      | 0.022   | 1.306   | 1.238  | 8.85E+04 | 1.97E+04 | 1.02E+02 | 1.27E+07 | 0.02445    | 0.2999     |
|                                                 | HPD95Lo | 1.09       | 0.194      | 0          | 0       | 0.418   | 0.4605 | 5.58E+04 | 9.92E+03 | 0.00E+00 | 4.71E+06 |            |            |
|                                                 | HPD95Hi | 2.686      | 0.742      | 3.234      | 3.154   | 0.562   | 2.998  | 1.37E+05 | 3.80E+04 | 1.65E+05 | 3.07E+07 |            |            |

Note, All estimates include the per gene mutation rate, which is equal to the geometric mean of the mutation rate of all the loci;  $\theta_1$  = effective population size of the first species;  $\theta_2$  = effective population size of the second species,  $\theta_A$  = effective population size of the ancestral population; m1 = population migration rate from the first to the second species; m2 = population migration rate from the second to the first species; T = time since species divergence; the population migration rate:  $2Nm = \theta \times m/2$ ;  $G=50$ ;  $N=\theta/4\mu G$ ;  $T=t/\mu$ .

**Supplementary Table S8.** Maximum-likelihood estimates (MLE) and the 95% highest posterior density (HPD) intervals of demographic parameters from multiple population IMA2 multi-loci analyses.

| Comparison |         | $\theta_1$ | $\theta_2$ | $\theta_3$ | $\theta_A$ | $\theta_B$ | t1     | t2    | N1       | N2       | N3       | NA       | NB       | T1(year) | T2(year) |
|------------|---------|------------|------------|------------|------------|------------|--------|-------|----------|----------|----------|----------|----------|----------|----------|
| MAE        | HiPt    | 0.4795     | 0.9995     | 0.4015     | 0.9995     | 0.0565     | 1.23   | 1.698 | 2.68E+04 | 5.58E+04 | 2.24E+04 | 5.58E+04 | 3.15E+03 | 1.37E+07 | 1.90E+07 |
|            | HPD95Lo | 0.2805     | 0.8075     | 0.2115     | 0.0235     | 0.0035     | 0.37   | 1.29  | 1.57E+04 | 4.51E+04 | 1.18E+04 | 1.31E+03 | 1.95E+02 | 4.13E+06 | 1.44E+07 |
|            | HPD95Hi | 0.7725     | 0.9995     | 0.7255     | 0.9995     | 0.9445     | 2.37   | 3.998 | 4.31E+04 | 5.58E+04 | 4.05E+04 | 5.58E+04 | 5.27E+04 | 2.65E+07 | 4.46E+07 |
| MCA        | HiPt    | 0.422      | 0.874      | 1.774      | 0.018      | 3.998      | 1.093  | 1.692 | 3.12E+04 | 6.46E+04 | 1.31E+05 | 1.33E+03 | 2.95E+05 | 1.61E+07 | 2.50E+07 |
|            | HPD95Lo | 0.214      | 0.582      | 1.218      | 0          | 0.614      | 0.5925 | 1.302 | 1.58E+04 | 4.30E+04 | 9.00E+04 | 0.00E+00 | 4.53E+04 | 8.75E+06 | 1.92E+07 |
|            | HPD95Hi | 0.698      | 1.27       | 2.502      | 2.914      | 3.998      | 1.853  | 4.997 | 5.16E+04 | 9.38E+04 | 1.85E+05 | 2.15E+05 | 2.95E+05 | 2.74E+07 | 7.38E+07 |

Note, All estimates include the per gene mutation rate, which is equal to the geometric mean of the mutation rate of all the loci;  $\theta_1$  = effective population size of the first species;  $\theta_2$  = effective population size of the second species,  $\theta_A$ (MAE) = effective population size of ancestral population between *J.sabina* and *J.semiglobosa*;  $\theta_A$ (MCA) = effective population size of ancestral population between *J.microsperma* and *J.sabina-J.semiglobosa*;  $\theta_B$  = effective population size of ancestral population;  $m_1$  = population migration rate from the first to the second species;  $m_2$  = population migration rate from the second to the first species; T = time since species divergence; G=50; N= $\theta/4\mu$ G; T= $t/\mu$ ; MAE: *J.microsperma*, *J.sabina*, *J.semiglobosa*; MCA: *J.microsperma*, *J.tibetica* complex, *J.sabina-J.semiglobosa*.

**Supplementary Table S9.** Prior distribution for the demographic parameters that were applied in the DIYABC program. Uniform distribution (UN) with 2 parameters: min and max; Gamma distribution (GA) with 3 parameters: min, max, shape; Log-Uniform (LU) distribution with 2 parameters: min and max; Ancestral effective population size (N3); Effective population size after expansion (N4); Effective population size after bottleneck (N1 and N2); Ancestral population expansion time (t4) and three population bottleneck times (t3, t2, t1).

| <b>Priors for the demographic parameters</b> |                                                        |
|----------------------------------------------|--------------------------------------------------------|
| N1                                           | UN~[50000-300000]                                      |
| N2                                           | UN~[300000 - 500000]                                   |
| N3                                           | UN~[1000000 - 2000000]                                 |
| Ne                                           | UN~[500000 - 1000000]                                  |
| t1                                           | UN~[100000- 1000000]                                   |
| t2                                           | UN~[1000000 - 3000000]                                 |
| t3                                           | UN~[4000000 - 8000000]                                 |
| t4                                           | UN~[17000000 - 20000000]                               |
| Constraint on parameter                      | $N1 < N2; N2 < N3; Ne > N3; t1 < t2; t2 < t3; t3 < t4$ |
| <i>Priors for the mutation model</i>         |                                                        |
| MEAN - $\mu$                                 | UN~[ 1.00E-9,1.00E-8]                                  |
| GAM - $\mu$                                  | GA~[ 1.00E-9,1.00E-5, 2]                               |
| MEAN - K_C/T                                 | UN~[0.05, 20]                                          |
| GAM - K_C/T                                  | GA~[0.05 , 20, 2]                                      |

**Supplementary Table S10.** Marginal posterior probability densities for the demographic parameters of all five demographic scenarios. Demographic scenarios 1 to 5 are represented in Fig. 8. The probability that simulated S is smaller than observed S [Prob. (Ssimul. < Sobs.)] is given for each summary statistic and was calculated from 10,000 virtual datasets simulated from the posterior distributions of parameters obtained under a given scenario. Significance levels are indicated by asterisks (\* and \*\* for  $Q < 0.05$  and  $Q < 0.01$ , respectively).

| Statistics (S) | Observed S | Scenarios |        |        |        |          | Probability (Ssimul. < Sobs.) |  |  |  |  |
|----------------|------------|-----------|--------|--------|--------|----------|-------------------------------|--|--|--|--|
|                |            | 1         | 2      | 3      | 4      | 5        |                               |  |  |  |  |
| NHA            | 3.8750     | 0.3425    | 0.2750 | 0.7945 | 0.2750 | 0.6915   |                               |  |  |  |  |
| NSS            | 5.7500     | 0.4799    | 0.6900 | 0.8175 | 0.7020 | 0.9555 * |                               |  |  |  |  |
| MPD            | 1.2011     | 0.4460    | 0.6670 | 0.8200 | 0.6825 | 0.9120   |                               |  |  |  |  |
| VPD            | 3.9370     | 0.5080    | 0.8145 | 0.8480 | 0.8310 | 0.9550 * |                               |  |  |  |  |
| DTA            | 0.0000     | 0.4868    | 0.6340 | 0.7635 | 0.6095 | 0.6745   |                               |  |  |  |  |
| PSS            | 5.7500     | 0.4799    | 0.6900 | 0.8175 | 0.7020 | 0.9555 * |                               |  |  |  |  |
| MNS            | 14.8447    | 0.5661    | 0.6840 | 0.9040 | 0.6455 | 0.7475   |                               |  |  |  |  |
| VNS            | 106.8668   | 0.4163    | 0.3800 | 0.8030 | 0.3920 | 0.5840   |                               |  |  |  |  |

Abbreviations for the summary statistics are as follows: number of haplotypes (NHA), number of segregating sites (NSS), mean of pairwise differences (MPD), variance of pairwise differences (VPD), Tajima's D (DTA), private segregating sites (PSS), mean of numbers of the rarest nucleotide at segregating sites (MNS) and variance of number of the rarest nucleotide at segregating sites (VNS). The probability (Ssimul. < Sobs.) given for each summary statistic was calculated from 10,000 virtual datasets simulated from the posterior distributions of parameters obtained under a given scenario. Significance levels are indicated by asterisks (\* and \*\* for  $Q < 0.05$  and  $Q < 0.01$ , respectively).

**Supplementary Table S11.** List of primers for the eight nuclear loci, their target sequence length, putative function, primer sequences and corresponding references<sup>1-6</sup>.

| Locus            | Length (bp) | Putative function                           | PCR primers (5'-3')                                | Reference              |
|------------------|-------------|---------------------------------------------|----------------------------------------------------|------------------------|
| nrDNA            |             |                                             |                                                    |                        |
| <i>CC1147</i>    | 612         | Unknown                                     | F:GCACCCATCTCACACTTGTC<br>R:CCACCCTGTTTCATGTGATTCT | Kado et al. 2008       |
| <i>CC2920</i>    | 685         | Beta-1,3-<br>glucanase like                 | F:CCGCCACATTCACGCCCTCT<br>R:CGCAGTTCCAGTAGTTTCTC   | Kado et al. 2008       |
| <i>HemA</i>      | 909         | Glutamyl-tRNA reductase                     | F:CTTCGGCAGCATCTCTTCAT<br>R:AACCTTAGCCCTGATTTTCT   | Tsumura et al. 1997    |
| <i>Pgi</i>       | 372         | Glucose-6-<br>phosphate isomerase           | F:GCCCAAATCCTCTGTGTCT<br>R:GACTTCCTGAGCCAATAATG    | Ujino-Ihara et al.2000 |
| <i>CC1333</i>    | 386         | GTP binding protein                         | F:CTCCTAGATCAGCGTATCACA<br>R:CCCTTTCTTGACCAGCAG    | Tani et al. 2003       |
| <i>CC2241</i>    | 351         | Glyceraldehyde-3-<br>phosphatedehydrogenase | F:CAGATTTTCATTGGAGACAGC<br>R:CAAATCTATGACTCGTGAAC  | Tani et al. 2003       |
| <i>Maldehy</i>   | 456         | Putative malate dehydrogenase               | F:CATATCCGTGATTGGGTGCTT<br>R:CAGTGGCATCCAGTTTTTCCT | Dvornyk et al. 2002    |
| <i>LHCA4</i>     | 733         | LHC I type IV chlorophyll-binding protein   | F:GGAGCTAGTGAACGGGAGGTG<br>R:GAACGGGCCCTTTCCTGTTA  | Dvornyk et al. 2002    |
| cpDNA            |             |                                             |                                                    |                        |
| <i>trnT-trnL</i> | 836         | Unknown                                     | F:CATTACAAATGCGATGCTCT<br>R:GGGGATAGAGGGACTCGAAC   | Taberlet et al. 1991   |
| <i>trnL-trnF</i> | 668         | Unknown                                     | F:CGGAATCGGTAGACGCTACG<br>R:ATTTGAACTGGTGACACGAG   | Taberlet et al. 1991   |

References:

1. Kado, T., Matsumoto, A., Ujino-Ihara, T. & Tsumura, Y. Amounts and patterns of nucleotide variation within and between two Japanese conifers, sugi (*Cryptomeria japonica*) and hinoki (*Chamaecyparis obtusa*)(Cupressaceae sensu lato). *Tree Genetics & Genomes* **4**, 133-141 (2008).
2. Tsumura, Y., Suyama, Y., Yoshimura, K., Shirato, N. & Mukai, Y. Sequence-tagged-sites (STSs) of cDNA clones in *Cryptomeria japonica* and their evaluation as molecular markers in conifers. *Theoretical and Applied Genetics* **94**, 764-772 (1997).
3. Ujino-Ihara, T. *et al.* Expression analysis of ESTs derived from the inner bark of *Cryptomeria japonica*. *Plant molecular biology* **43**, 451-457 (2000).
4. Tani, N., Tsumura, Y. & Sato, H. Nuclear gene sequences and DNA variation of *Cryptomeria japonica* samples from the postglacial period. *Molecular Ecology* **12**, 859-868 (2003).
5. Dvornyk, V., Sirviö, A., Mikkonen, M. & Savolainen, O. Low nucleotide diversity at the pal1 locus in the widely distributed *Pinus sylvestris*. *Molecular Biology and Evolution* **19**, 179-188 (2002).
6. Taberlet, P., Gielly, L., Pautou, G. & Bouvet, J. Universal primers for amplification of three non-coding regions of chloroplast DNA. *Plant Molecular Biology* **17**, 1105-1109 (1991).



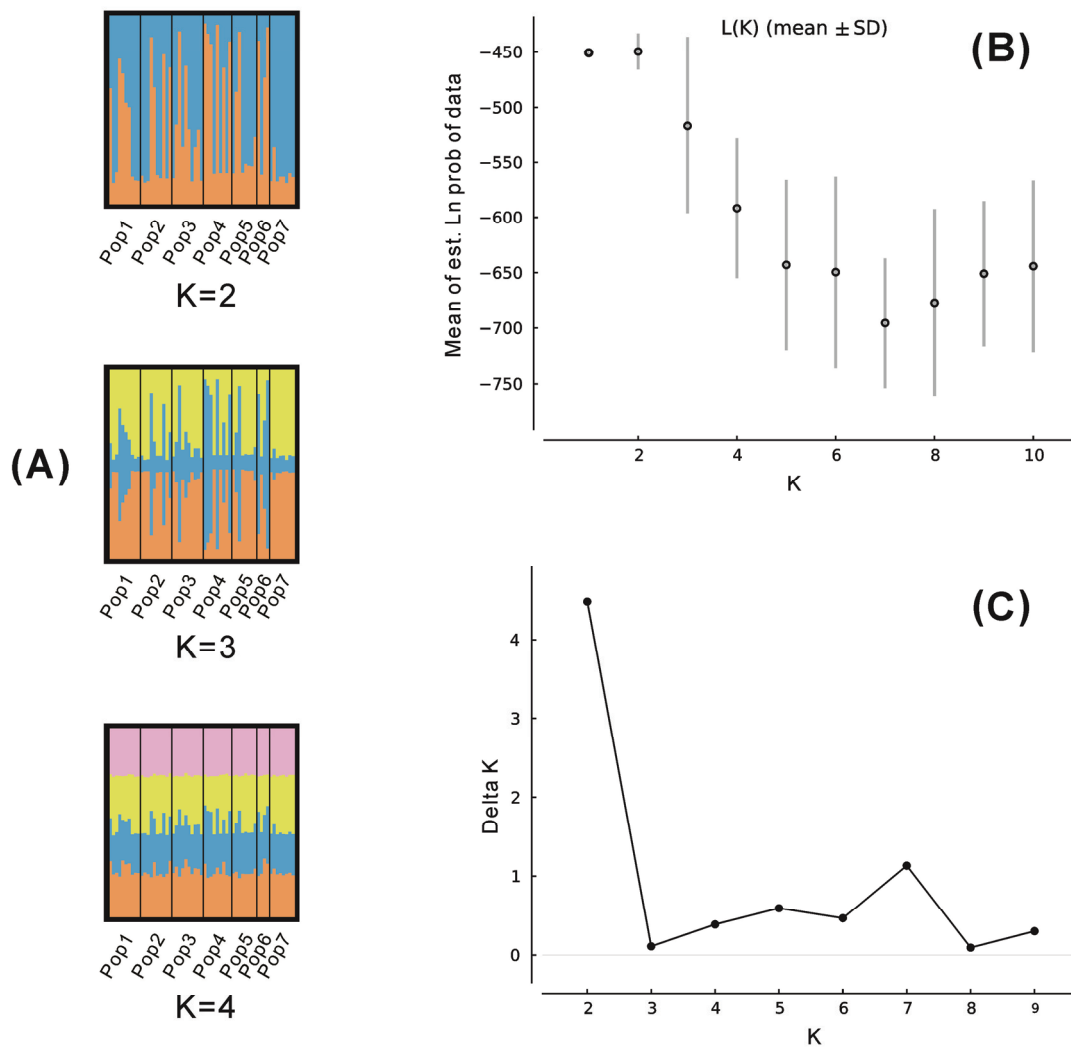

**Supplementary Figure S1.** (A) Bayesian clustering for individuals of *Juniperus microsperma* based on eight nuclear loci, assuming two, three and four clusters (K=2, 3, 4); (B) Mean LnPD values of nine runs that assumed two to ten clusters (K=2–10); (C) Delta K values of eight runs that assumed two to nine clusters (K=2–9), and for each K value, results of the run with the highest value of LnPD were used. Thin vertical lines in (A) represent boundaries among populations; open circles and gray bars in (B) represent the mean value and the standard deviation of LnPD for each run.

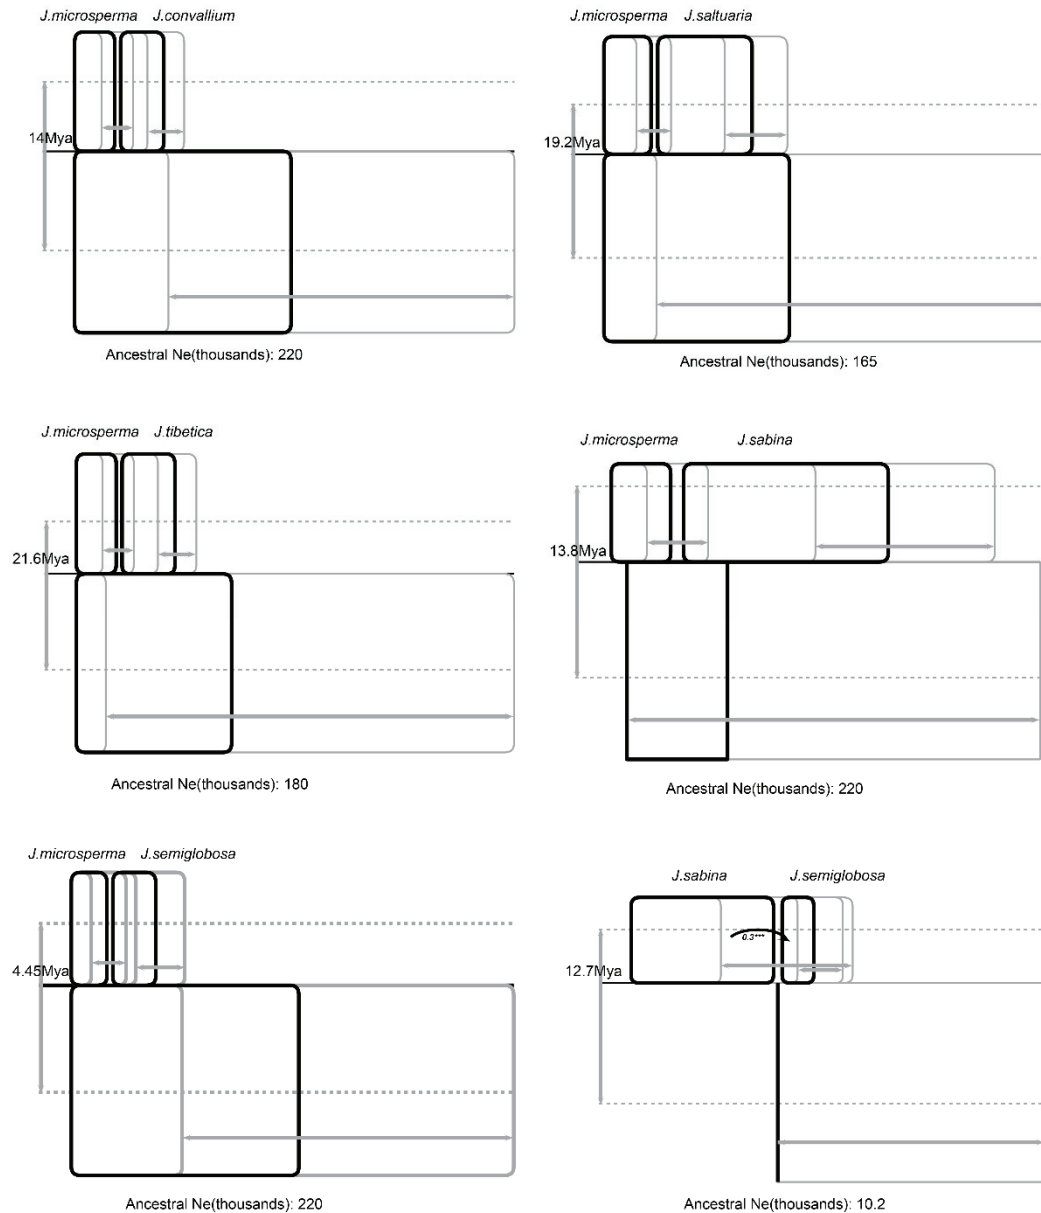

**Supplementary Figure S2.** Histories for six species pairs, *Juniperus microsperma* and each of its five congeners, are represented as boxes (for both sampled and ancestral populations). Boxes spanning from the top border of each subfigure represent living populations, whereas other boxes represent ancestral populations. For each box, its horizontal and vertical widths represent effective population size and time, respectively. Curved arrows linking boxes represent migration between populations. Time is represented on the vertical axis in each figure, with the sampled species names provided at the top of each figure at the most recent time point. For all figures, the 95% highest posterior density intervals are shown with gray arrows for population sizes (i.e. box widths) and splitting times (dotted lines). Only those population migration rates that were found to be statistically significant using a

likelihood-ratio test are shown, in which case the estimated value of  $2Nm$  is provided in addition to the significance level: \* $P < 0.05$ , \*\* $P < 0.01$ , \*\*\* $P < 0.001$ .
